# Supplementary material for: ProHealth eCoach: user-centered design and development of an eCoach app to promote healthy lifestyle with personalized activity recommendations
Source: BMC Health Serv Res. 2022 Sep 4;22:1120. doi: 10.1186/s12913-022-08441-0 (PMC9440769; doi:10.1186/s12913-022-08441-0)
Supplement: Supplementary file 5 — Additional file 5. The outcome of the focus group discussion for RQ-4 in Workshop 1. [file 12913_2022_8441_MOESM5_ESM.xlsx]

## Sheet: appendix-4
Title	Outcome of the focus group discussion for RQ-4.
Group	Feedback presentation and information visualization
Group-1	Preferred way for the user (speech, visual, animations, friend, etc.)
	Recommendations based on user’s preferences Iterate focused on the user experience
Group-2	Graphs and statistics might not mean enough (if anything) to most people
	Iconography to convey feedback without requiring much cognitive involvement of user (e.g., thumbs up)
	Concrete overview of the status of daily nutrition (concrete aspects of nutrition, i.e., how much of daily allowances consumed already)
Group-3	Continuous as apple watch, Samsung smart watch (status vs goal vs parameter), AR/VR fitness interface, e.g., for home training, Audio feedback
	Create AR games that use phones as checkpoints, Simplistic view, using “humming” instead of visual data, Not training for fitness but for “techniques” too, make it user-specific, Motivation with audio, video to increase tempo.
Group-4	Mood – Happy or sad, Follow ups
